# Supplementary material for: Endovascular Treatment of Large Vessel Occlusion Strokes Caused by Infective Endocarditis: A Systematic Review, Meta-Analysis, and Case Presentation
Source: MDPI journal article supplement (doi:10.3390/life12122146), 2022-12-19
Supplement: s1 [file s1]

## **Supplementary Materials**

---

**Part A: Search Strategy.**

**Part B: Forest plots of ICH, mortality, recurrence, and funnel plots of analyzed studies.**

**Part C: A more detailed table of outcomes of studies investigating the safety and outcome of MT for patients with stroke secondary to IE.**

**Part A: Search Strategy**

**(((((Endocarditis[MeSH Terms]) OR (Infective Endocarditis[Title/Abstract])) OR (Infective Endocarditides[Title/Abstract])) OR (Septic emboli[Title/Abstract])) AND ((((((Stroke[MeSH Terms]) OR (Cerebrovascular Accident[Title/Abstract])) OR (CVA[Title/Abstract])) OR (Brain Vascular Accident[Title/Abstract])) OR (Brain infarct[Title/Abstract])) OR (Large vessel occlusion[Title/Abstract])) AND (((((((((((Thrombectomy[MeSH Terms]) OR (Mechanical Thrombolysis[MeSH Terms])) OR (Endovascular Procedures[MeSH Terms])) OR (Thrombectomies[Title/Abstract])) OR (Percutaneous Aspiration Thrombectomy[Title/Abstract])) OR (Percutaneous Aspiration Thrombectomies[Title/Abstract])) OR (Mechanical Thrombectomy[Title/Abstract])) OR (Mechanical Clot Disruption[Title/Abstract])) OR (Endovascular treatment[Title/Abstract])) OR (Endovascular Procedure[Title/Abstract])) OR (Intravascular Procedure[Title/Abstract])) OR (Intravascular Technique[Title/Abstract])) OR (Endovascular Technique[Title/Abstract])) OR (Endovascular[Title/Abstract]))**

**Part B: Forest plots of ICH, mortality, recurrence, and funnel plots of analyzed studies.**

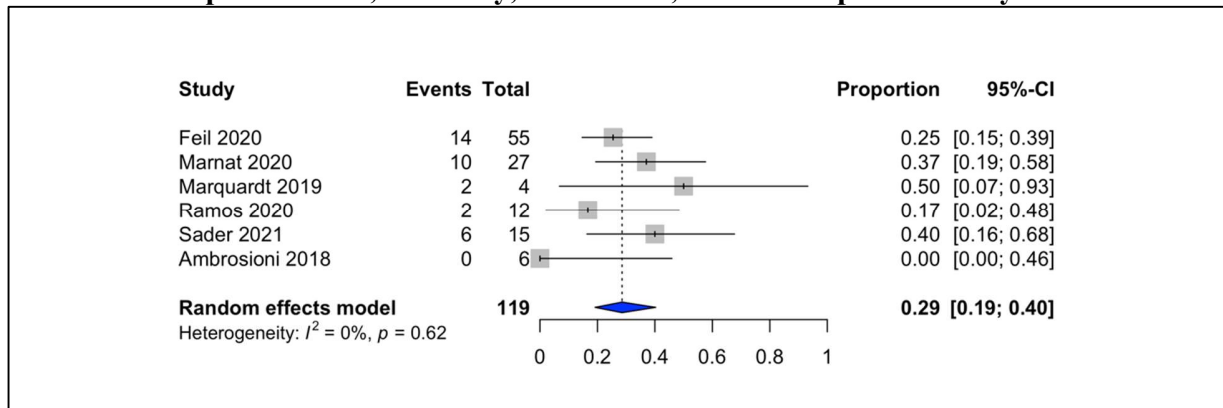

**Figure S1.** Forest plot of pooled rate of ICH.

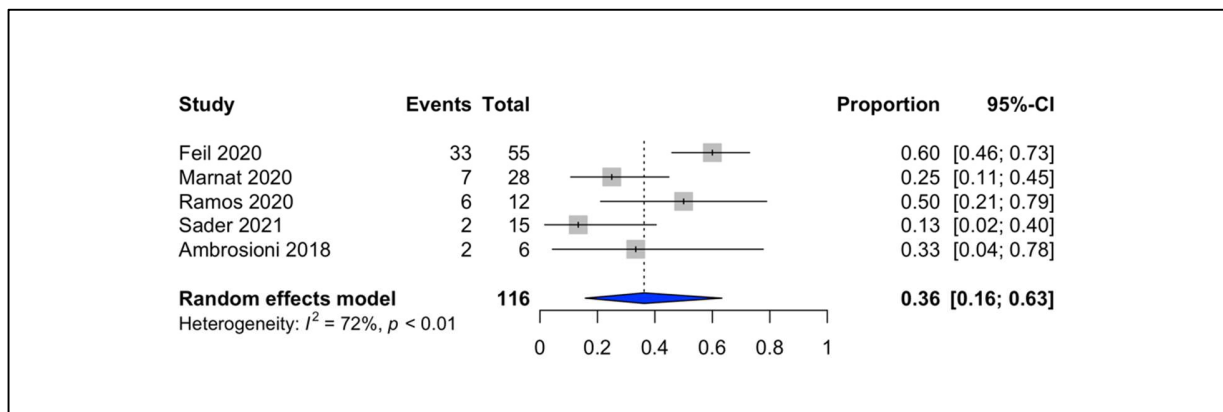

**Figure S2.** Forest plot of pooled rate of mortality.

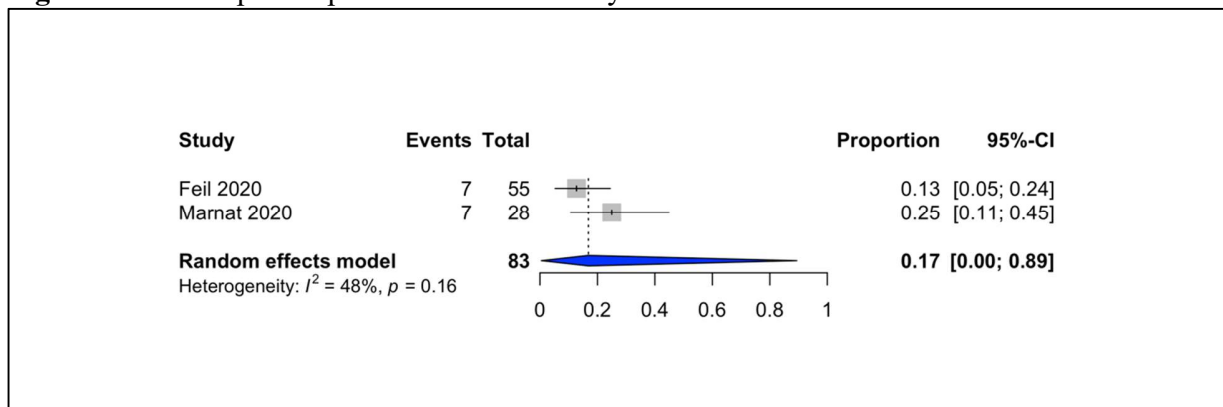

**Figure S3.** Forest plot of pooled rate of stroke recurrence.

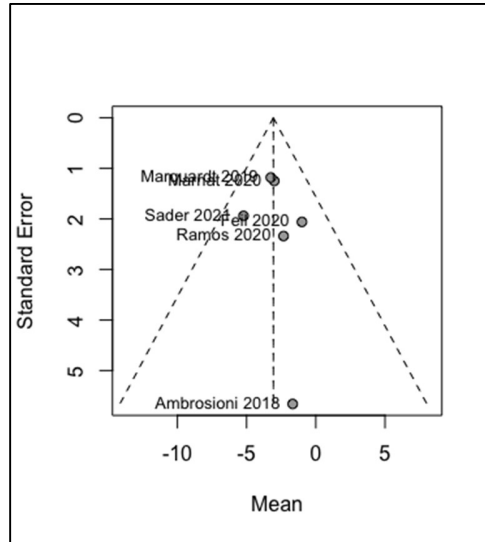

**Figure S4.** Funnel plot of pooled WMD of NIHSS.

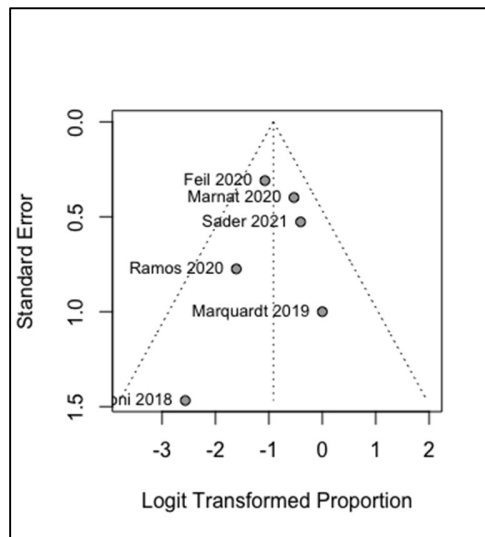

**Figure S5.** Funnel plot of pooled rate of ICH.

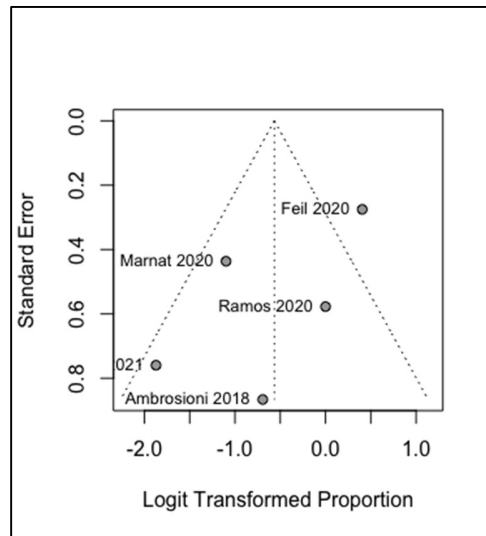

**Figure S6.** Funnel plot of pooled rate of mortality.

**Part C: A more detailed table of outcomes of studies investigating the safety and outcome of MT for patients with stroke secondary to IE.**

| Author          | Follow up | Baseline NIHSS | Baseline ASPECT  | Baseline mRS                | Treatment approach for intracranial LVO,                                                                                                                             | Periprocedural complications                                                                                                 | reperfusion mTICI                                           | NIHSS in F/U | ICH in F/U                                     | Complications during hospital stay                                                                                             | Mortality, or mRS= 6 |
|-----------------|-----------|----------------|------------------|-----------------------------|----------------------------------------------------------------------------------------------------------------------------------------------------------------------|------------------------------------------------------------------------------------------------------------------------------|-------------------------------------------------------------|--------------|------------------------------------------------|--------------------------------------------------------------------------------------------------------------------------------|----------------------|
| Feil 2020       | 24 hrs    | 15(8.14)       | 8(7-10)          | 1 (0–1) available in n = 54 | Aspiration catheter solo: 11<br>Stent retriever solo: 10<br>Combination:31<br>Additive medication during MT: 13                                                      | Device malfunction : 2<br>Dissection, perforation: 2<br>Clot migration, embolization: 1<br>ICH:3<br>Vasospasm: 2<br>Other: 4 | mTICI 2b/3: 41                                              | 16 (17.65)   | 14                                             | Malignant MCA infarction: 7<br>Recurrent stroke: 7<br>ICH:17<br>Groin hematoma:2<br>Groin aneurysm:2<br>Other complications:27 | 33                   |
|                 | 3 months  |                |                  |                             |                                                                                                                                                                      |                                                                                                                              |                                                             |              |                                                |                                                                                                                                |                      |
| Marnat 2020     | 24 hrs    | 16.5 (6.66)    | 7.0 (6.0 to 8.0) |                             | Aspiration : 11/25<br>Stent retriever : 6/25<br>Combination:4/25<br>Balloon + SR: 4/25                                                                               | 2                                                                                                                            | mTICI 3:12/28<br>mTICI 2c/3: 20/28<br>mTICI 2b/3:24/28      | - 3 (6.66) * | Any ICH:10<br>Paranchymal Hematoma:2<br>sICH:2 |                                                                                                                                | 7/27                 |
|                 | 3 months  |                |                  |                             |                                                                                                                                                                      |                                                                                                                              |                                                             |              |                                                |                                                                                                                                |                      |
| Marquardt 2019  | 24 hrs    | 17.25(3.89)    |                  |                             | Mechanical thrombectomy - Solitaire and Penumbra :2<br>Mechanical thrombectomy-Solitaire and Wingspan stent: 1<br>Mechanical thrombectomy-Penumbra with 2mg IA-tPA:1 |                                                                                                                              | TICI 2A:2<br>TICI 2B:1<br>TICI 3:1                          | 14(3.31)     | 2                                              | ICH:2                                                                                                                          |                      |
| Ramos 2020      | 24 hrs    | 13.08(6.94)    | 9(8-10)          |                             |                                                                                                                                                                      | 2                                                                                                                            | TICI 0:3<br>TICI 1:2<br>TICI 2A: 1<br>TICI 2B:1<br>TICI 3:5 | 10.75(8.92)  | 2                                              | 6                                                                                                                              | 6                    |
|                 | 3 months  |                |                  |                             |                                                                                                                                                                      |                                                                                                                              |                                                             |              |                                                |                                                                                                                                |                      |
| Sader 2021      | UK        | 17.93(5.37)    |                  | 0 ( 0-4)                    |                                                                                                                                                                      |                                                                                                                              | TICI 0:1<br>TICI 2a:1<br>TICI 2c:1<br>TICI 2b:4<br>TICI 3:6 | 12.71(8.59)  | 6                                              |                                                                                                                                | 2                    |
|                 |           |                |                  |                             |                                                                                                                                                                      |                                                                                                                              |                                                             | 9.2(6.57)    |                                                |                                                                                                                                |                      |
| Ambrosioni 2018 | 24 hrs    | 14.33(10.19)   |                  |                             | Stent retriever plus carotid stent : 1<br>Stent retriever:5                                                                                                          |                                                                                                                              | mTICI 0 :1<br>mTICI 2B: 1<br>mTICI 3: 3                     | 12.66(15.8)  | 0                                              |                                                                                                                                |                      |

|  |          |  |  |  |  |  |  |  |  |   |
|--|----------|--|--|--|--|--|--|--|--|---|
|  | 7 days   |  |  |  |  |  |  |  |  | 2 |
|  | 3 months |  |  |  |  |  |  |  |  | 3 |

F/U: Follow-up, ICH: Intracranial Hemorrhage, MCA: Middle Cerebral Artery, MT: Mechanical Thrombectomy, mRS: Modified Rankin Scale, N: Number of patients, NIHSS: National Institute of Health Stroke Scale, SR: Stent Retriever, TICI: Thrombolysis in Cerebral Infarction, tPA: Tissue Plasminogen Activator.

\* Change has been reported.
